# Supplementary material for: Multiplexed, Sequential Secretion Analysis of the Same Single Cells Reveals Distinct Effector Response Dynamics Dependent on the Initial Basal State
Source: PubMed Central journal article supplement (PMC6498135; doi:10.1002/advs.201801361), 2019-03-13
Supplement: ADVS-6-1801361-s001.pdf [file ADVS-6-1801361-s001.pdf]

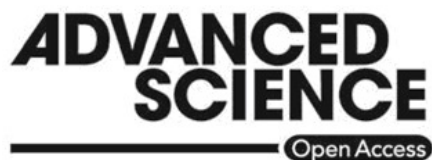

## Supporting Information

for *Adv. Sci.*, DOI: 10.1002/adv.201801361

**Multiplexed, Sequential Secretion Analysis of the Same  
Single Cells Reveals Distinct Effector Response Dynamics  
Dependent on the Initial Basal State**

*Zhuo Chen, Yao Lu,\* Kerou Zhang, Yang Xiao, Jun Lu, and  
Rong Fan\**

## **Supporting Information**

### **Multiplexed, sequential secretion analysis of the same single cells reveals distinct effector response dynamics dependent on the initial basal state**

Zhuo Chen<sup>1#</sup>, Yao Lu<sup>1,2##</sup>, Kerou Zhang<sup>1</sup>, Yang Xiao<sup>1</sup>, Jun Lu<sup>3,4</sup>, and Rong Fan<sup>1,3,4,5\*</sup>

<sup>1</sup> Department of Biomedical Engineering, Yale University, New Haven, CT 06520, USA

<sup>2</sup> Department of Biotechnology, Dalian Institute of Chemical Physics, Chinese Academy of Sciences, Dalian, Liaoning, 116023 China

<sup>3</sup> Department of Genetics, Yale School of Medicine, New Haven, CT 06520, USA

<sup>4</sup> Yale Stem Cell Center, New Haven, CT 06520, USA

<sup>5</sup> Yale Cancer Center, New Haven, CT 06520, USA

# these authors contribute equally to this work.

\* corresponding authors, Y.L.(luyao@dicp.ac.cn) and R.F. (rong.fan@yale.edu)

Yao Lu, Ph.D.

Department of Biotechnology

Dalian Institute of Chemical Physics, Chinese Academy of Sciences

457 Zhongshan Road, Dalian, Liaoning, 116023 China

Email: luyao@dicp.ac.cn

Rong Fan, Ph.D.

Department of Biomedical Engineering

55 Prospect St, MEC 213

New Haven, CT 06520

U.S.A.

Email: [rong.fan@yale.edu](mailto:rong.fan@yale.edu)

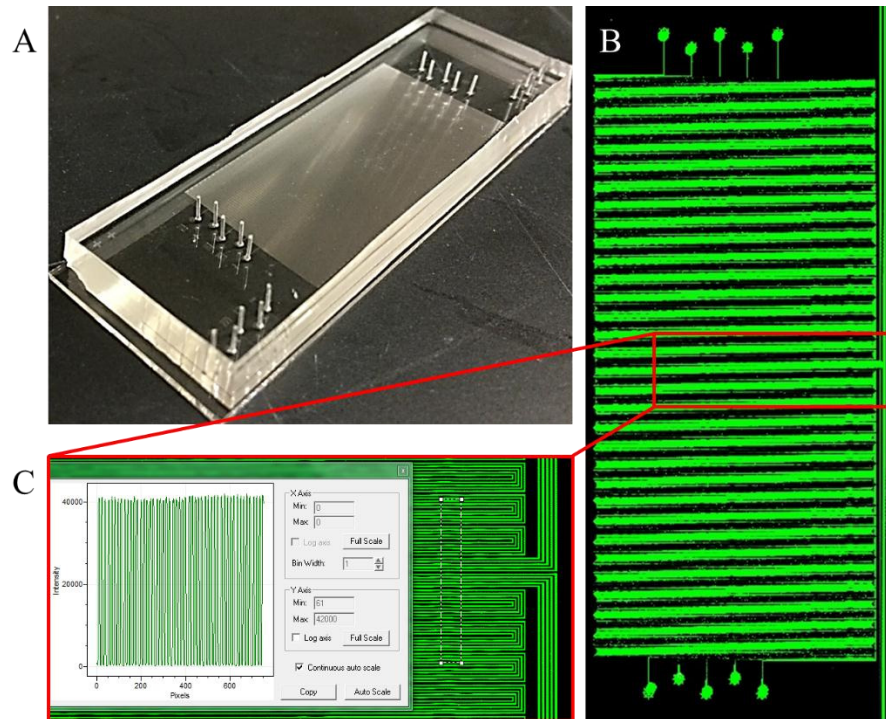

**Figure S1.** Evaluation of the protein coating uniformity flow-patterned with antibody barcode microchannel. A) Optical image showing the PDMS microchip for antibody flow patterning; B) whole glass slide fluorescence scanning; (C) magnified view of fluorescence intensity across the flow patterned poly-L-lysine slide revealed excellent uniformity of the immobilized proteins (FITC-BSA) in two separated paths, which ensures the validity of using this high-density barcode array technology to assess single cell heterogeneity.

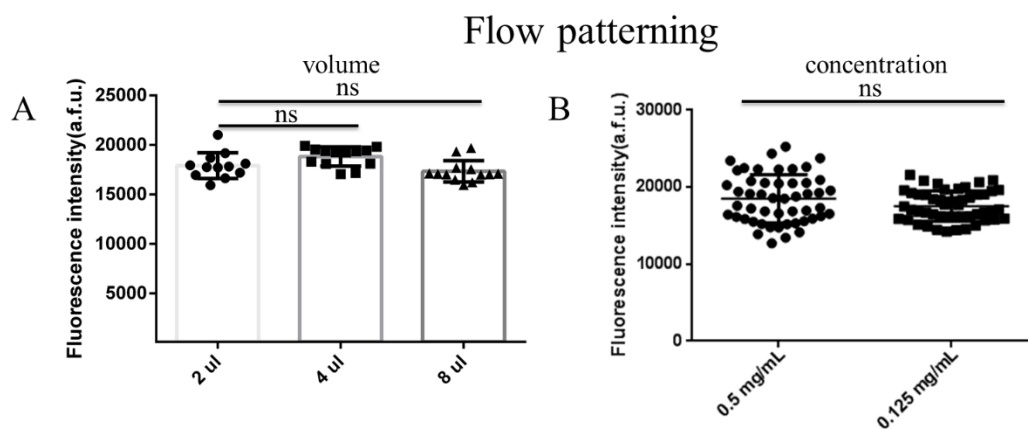

**Figure S2.** Evaluation of the antibody flow patterning conditions. A, different volume of antibodies; B, different antibody dilutions. The results showed no significant differences with varied flow patterning conditions.

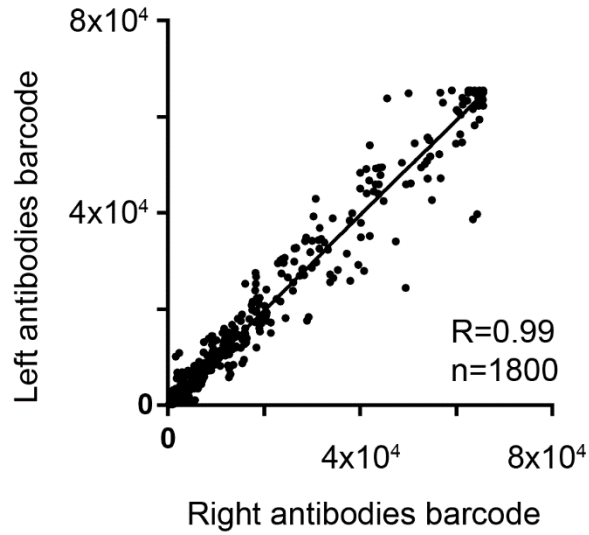

**Figure S3.** Characterization of the fluorescence detection results based on left and right antibodies barcode, which showed nice correlation between them.

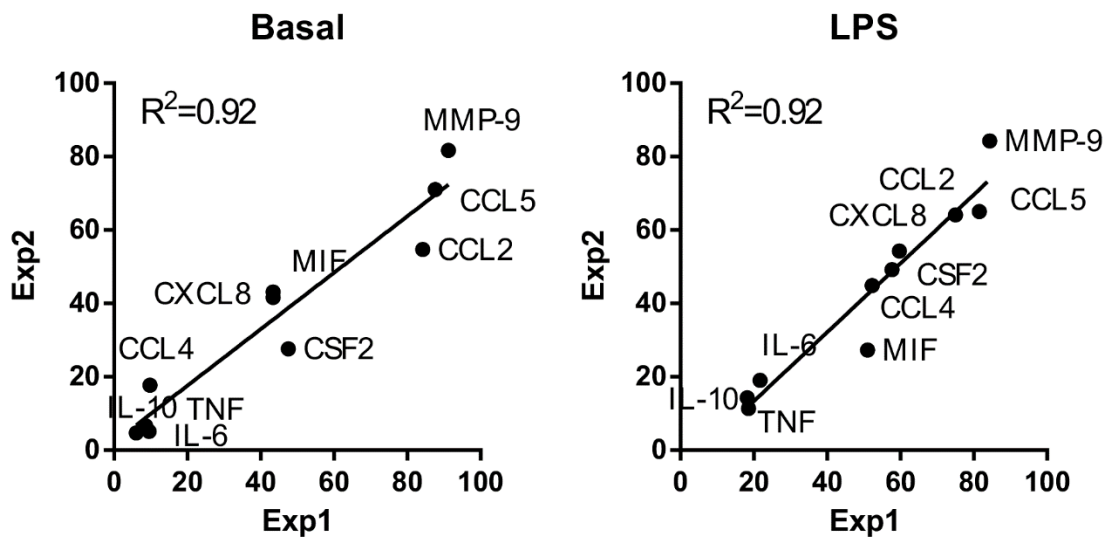

**Figure S4.** Validation of reproducibility of the single-cell barcode chip. Cytokine secretion frequencies (10 proteins) with U937 derived macrophages from two independent experiments (basal and LPS) showed high, linear correlation ( $R^2 = 0.92$ ).

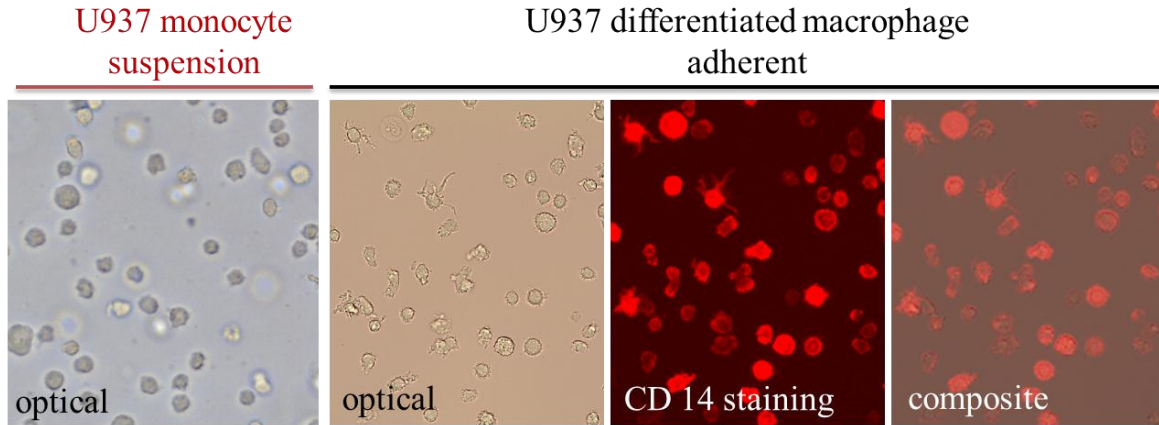

**Figure S5.** Images showing differentiation of U937 monocyte cells. Monocyte cells became adherent when differentiated into macrophage cells with 50 ng/mL PMA for 48 hours.

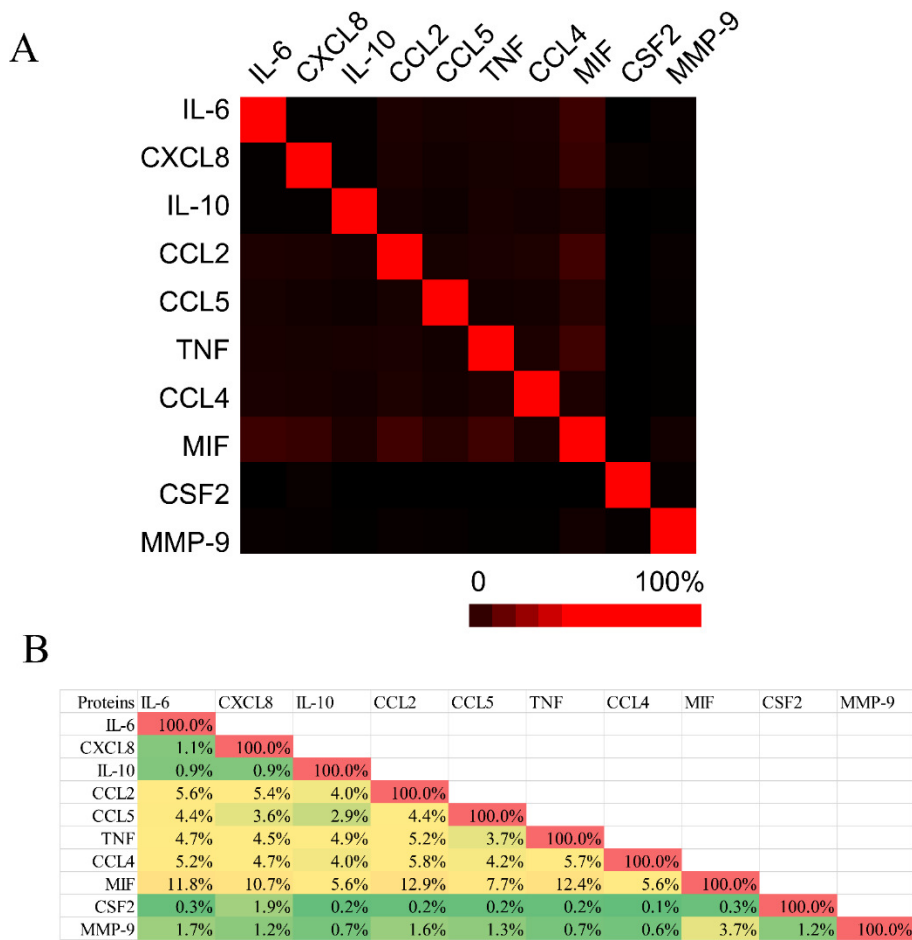

**Figure S6.** Cross-reactivity check for all proteins (A: heatmap; B: raw values). Most of the antibodies used in this study are monoclonal antibodies to ensure good specificity and

reduce cross reactivity. The test was conducted by spiking a single antigen (recombinant protein) in a solution applied to a full capture antibody microarray containing all capture antibodies, followed by detection with a mixture of all detection Ab

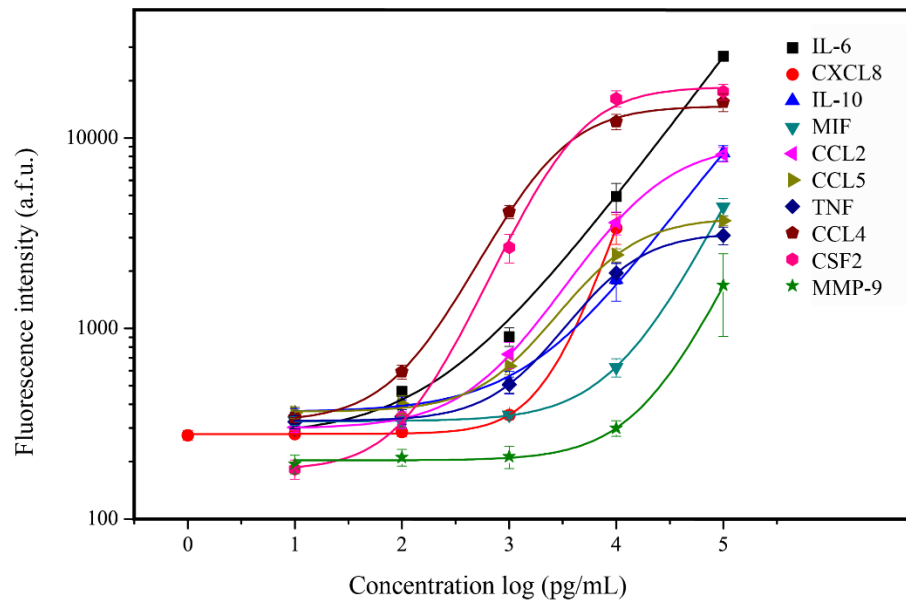

**Figure S7.** Calibration curves obtained with corresponding recombinant proteins (x, y axes: log-scaled, the intensities were averaged from 16 spots for each data).

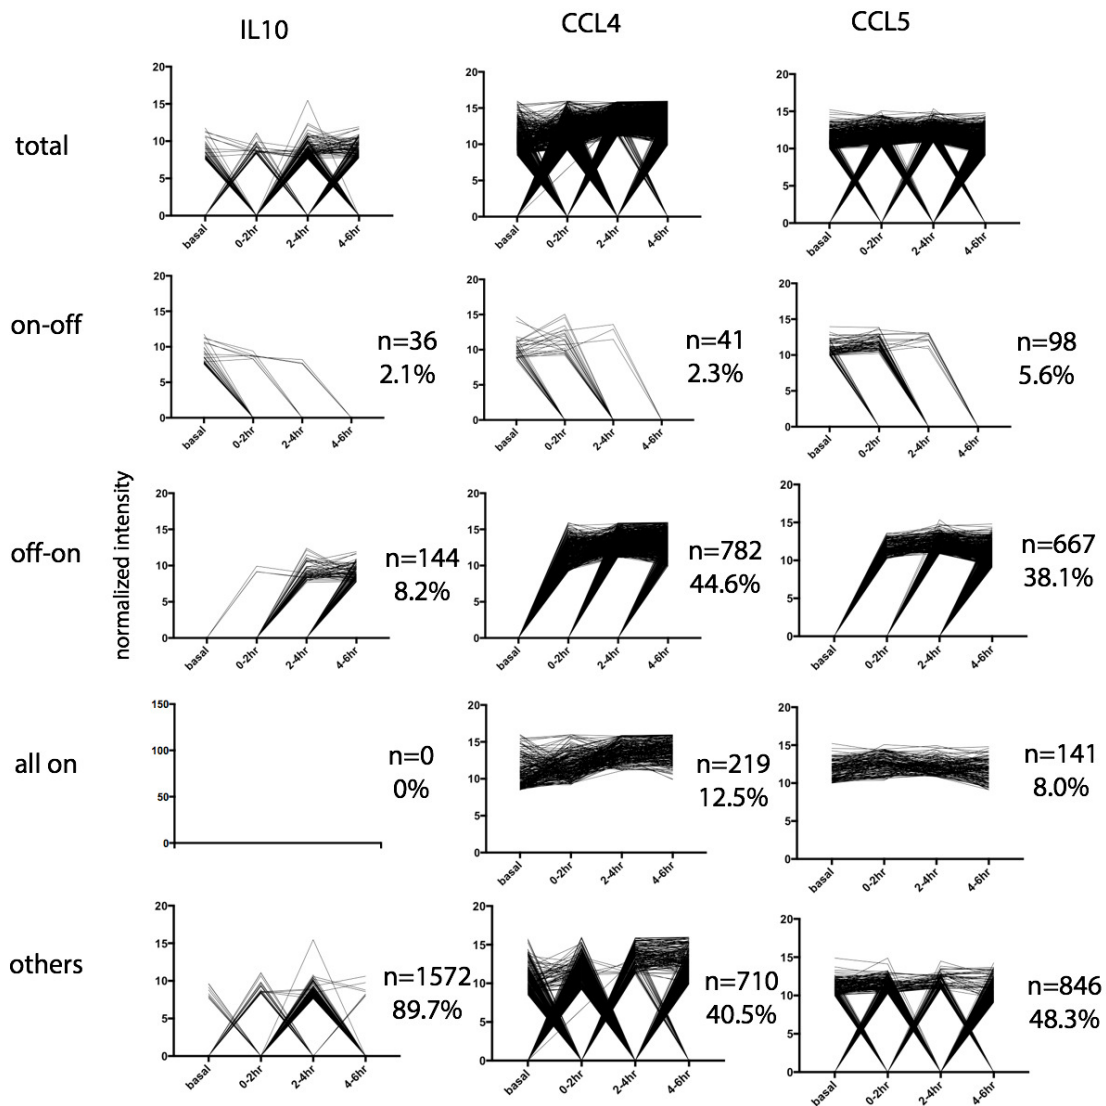

**Figure S8.** Classification of single cells based on their protein secretion dynamics.

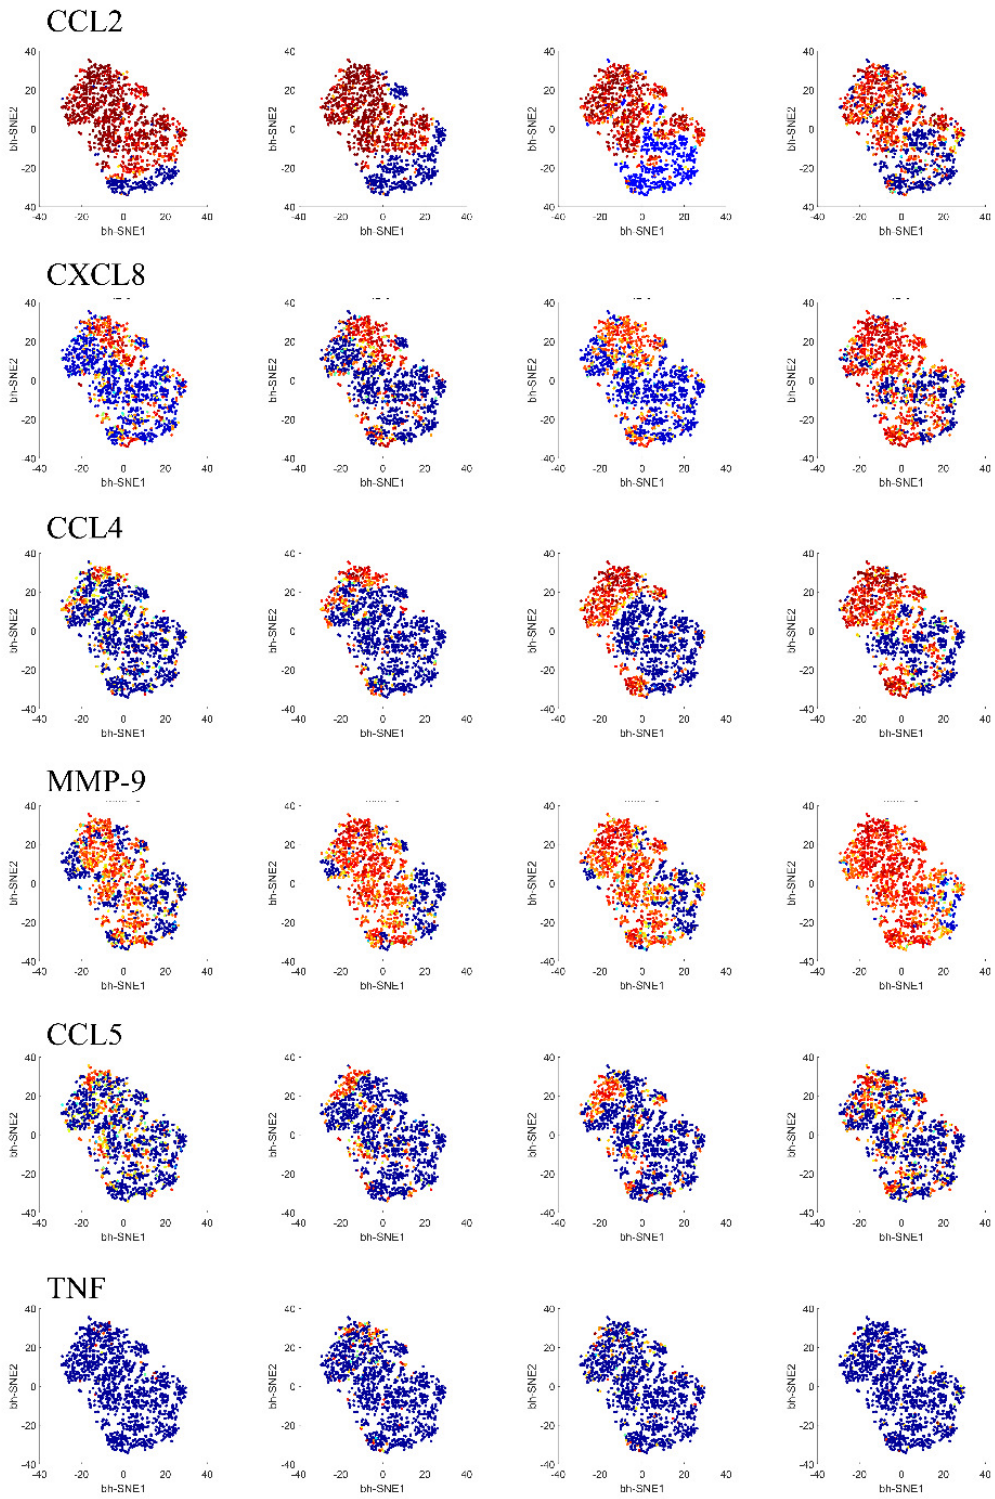



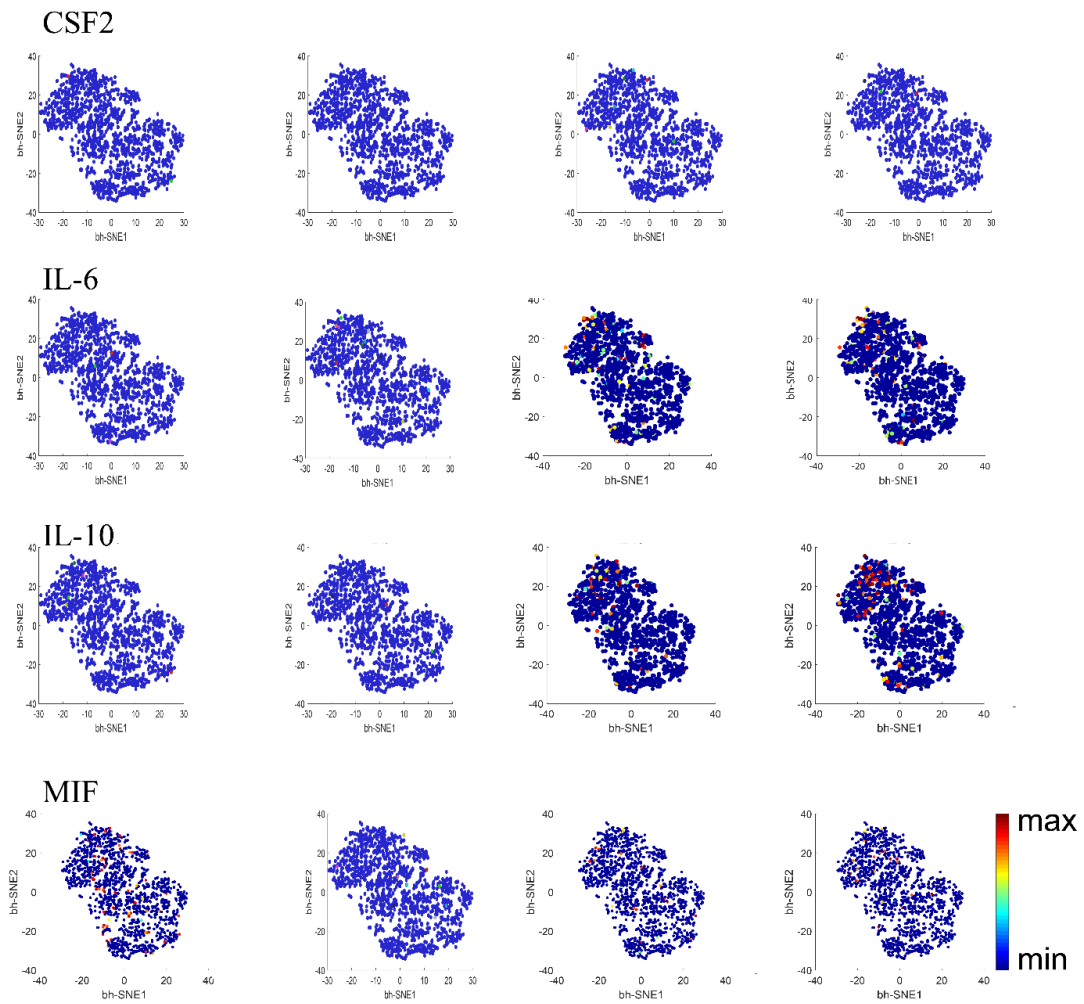

**Fig. S9** viSNE maps showing the distribution of each protein at different time points.

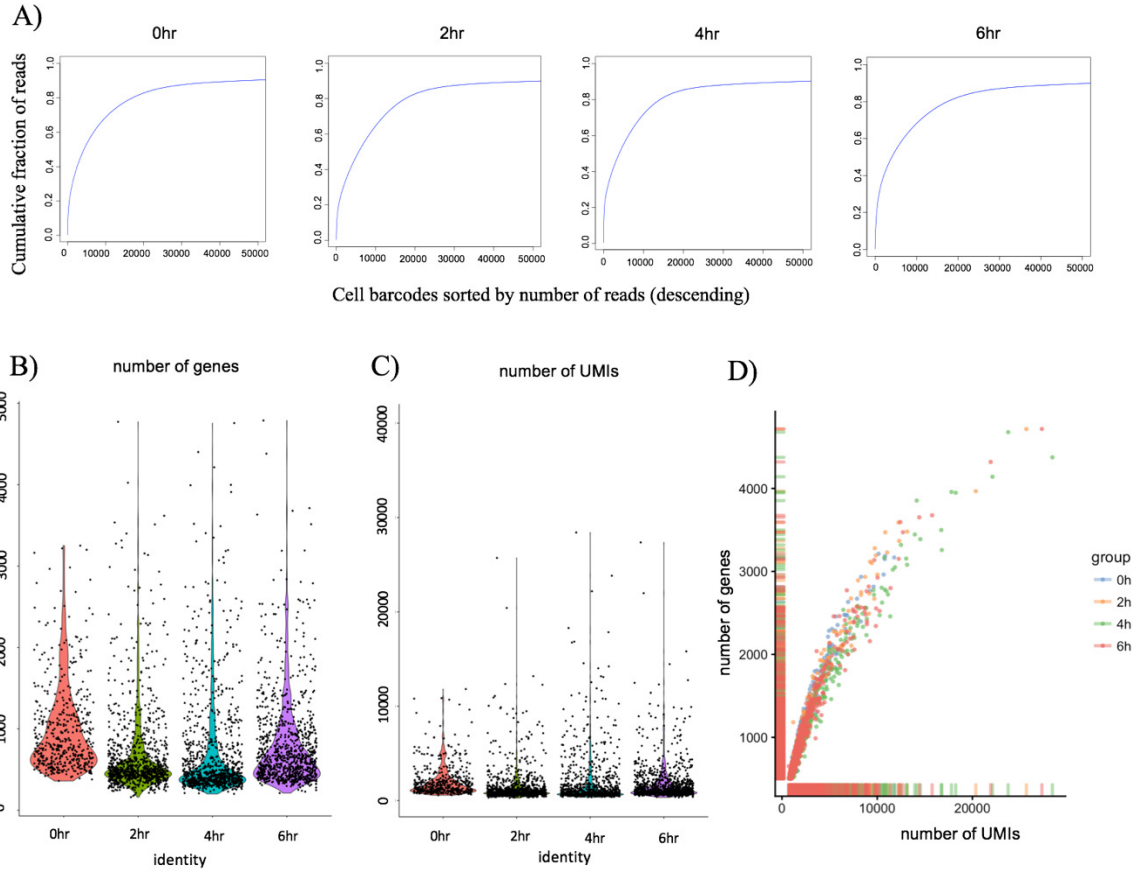

**Figure S10.** Quality control of single-cell RNA-Seq data. A) Saturation curve of sequencing reads. The deflection point of the curve shows the approximate number of cells sequenced. B) Violin plots showing distribution of number of genes detected from each single cell. C) Violin plots showing distribution of number of UMIs detected from each single cell. D) correlation between number of genes and UMIs detected from each single cell.

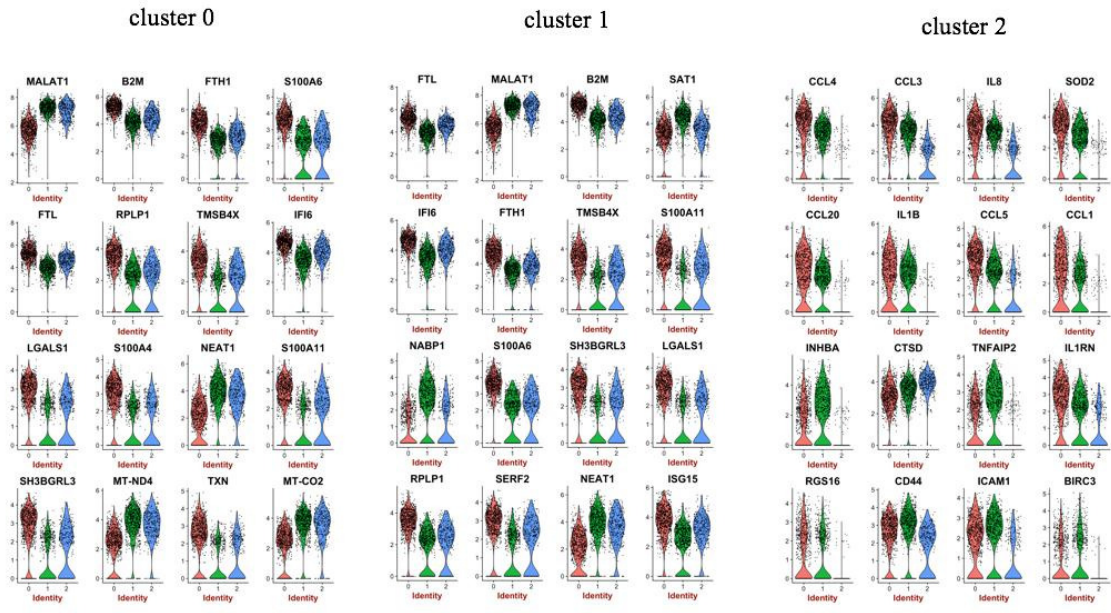

**Figure S11.** Top 16 marker genes of the three clusters, respectively.

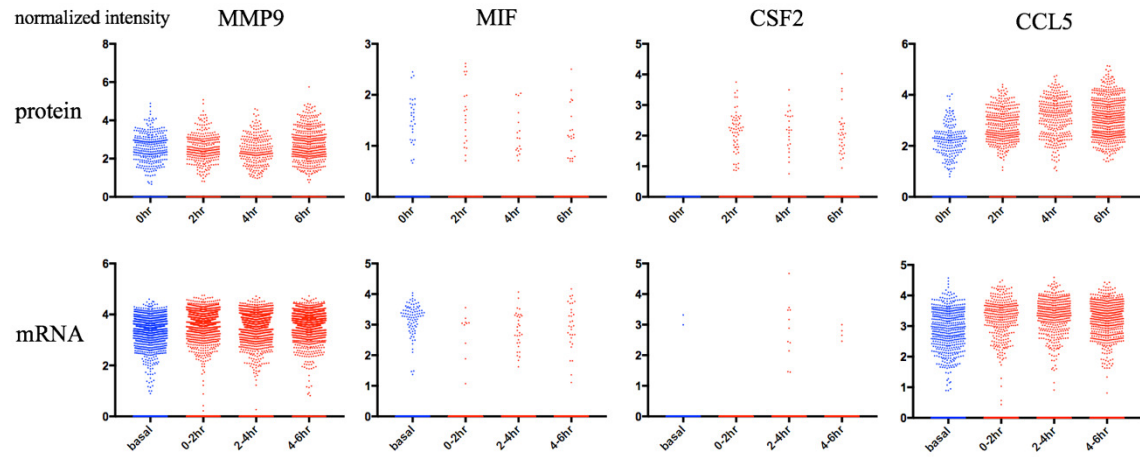

**Figure S12.** Comparative study of single-cell RNA expression and protein secretions.

**Supplementary Table S1:** Summary of antibodies (name, clone, company, catalog) used in this study (most are monoclonal antibodies).

| <i>Protein</i>      | <b>Capture antibody<br/>Isotype/clone/vendor/catalog</b> | <b>Detection antibody<br/>Isotype/clone/vendor<br/>/catalog</b> |
|---------------------|----------------------------------------------------------|-----------------------------------------------------------------|
| <b><i>IL6</i></b>   | Rat IgG2a, κ /MQ2-39C3/Biolegend/501204                  | Rat IgG1, κ /MQ2-13A5/Biolegend/501102                          |
| <b><i>CXCL8</i></b> | Mouse IgG1, κ /H8A5/Biolegend/511502                     | Mouse IgG1, κ /E8N1/Biolegend/511402                            |
| <b><i>IL10</i></b>  | Rat IgG2a, κ /JES3-12G8/Biolegend/501504                 | Rat IgG1, κ /JES3-9D7/Biolegend/501402                          |
| <b><i>MIF</i></b>   | Mouse IgG1 Kappa/2A10-4D3/Abnova/H00004282-M01           | Mouse IgG1 Kappa/2A10-4D3/Abnova/H00004282-M01                  |
| <b><i>CCL2</i></b>  | Mouse IgG1, κ /5D3-F7/Biolegend/502607                   | Armenian Hamster IgG /2H5/Biolegend/505902                      |
| <b><i>CCL5</i></b>  | Mouse IgG2b kappa/VL1/Invitrogen/AHC1052                 | Mouse IgG1 /21418/RD/MAB678                                     |
| <b><i>TNF</i></b>   | Mouse IgG1, κ /Mab11/Biolegend/502902                    | Mouse IgG1, κ /MAb1/Biolegend/502802                            |
| <b><i>CCL4</i></b>  | Mouse IgG1 kappa/A174E18A7/Invitrogen/AHC6114            | Mouse IgG2B /24006/RD/MAB271                                    |
| <b><i>CSF2</i></b>  | Rat IgG2a, κ /BVD2-23B6/Biolegend/502202                 | Rat IgG2a, κ /BVD2-21C11/Biolegend/502304                       |
| <b><i>MMP9</i></b>  | Mouse IgG1 /36020/RD/MAB936                              | Goat IgG /polyclonal/RD/BAF911                                  |

**Supplementary Table S2:** Reagents used in single-cell RNA-Seq experiment.

| <b><i>Reagents</i></b>                              | <b>Supplier</b> | <b>Catalog #</b> |
|-----------------------------------------------------|-----------------|------------------|
| <b><i>Barcoded microparticles</i></b>               | Chemgenes       | N/A              |
| <b><i>Maxima H-Reverse Transcriptase</i></b>        | Thermo          | EP0753           |
| <b><i>dNTP mix</i></b>                              | Clontech        | 639125           |
| <b><i>RNase inhibitor</i></b>                       | Lucigen         | 30281-2          |
| <b><i>Perfluorooctanol</i></b>                      | Sigma           | 370533           |
| <b><i>Exonuclease I</i></b>                         | NEB             | M0293L           |
| <b><i>KAPA Hifi HotStart Readymix</i></b>           | KAPA BioSystems | KK2602           |
| <b><i>Nextera XT DNA sample preparation kit</i></b> | Illumina        | FC-131-1096      |
| <b><i>Ampure XP beads</i></b>                       | Backman Coulter | A63882           |
